# Supplementary material for: Hypertonic dextrose injections (prolotherapy) in the treatment of symptomatic knee osteoarthritis: A systematic review and meta-analysis
Source: PubMed Central journal article supplement (PMC4857084; doi:10.1038/srep25247), 2016-05-05
Supplement: srep25247-s1.pdf [file srep25247-s1.pdf]

## **Hypertonic dextrose injections (prolotherapy) in the treatment of symptomatic knee osteoarthritis: A systematic review and meta-analysis**

Regina WS Sit<sup>1</sup>, Vincent CH Chung<sup>1,\*</sup>, Kenneth D. Reeves<sup>2</sup>, David Rabago<sup>3</sup>, Keith KW Chan<sup>1</sup>, Dicken CC Chan<sup>1</sup>, Xinyin Wu<sup>1</sup>, Robin ST Ho<sup>1</sup>, Samuel YS Wong<sup>1</sup>

<sup>1</sup> The Chinese University of Hong Kong, The Jockey Club School of Public Health and Primary Care, Hong Kong

<sup>2</sup> Dean K. Reeves, MD, 4740 El Monte St, Roeland Park, KS 66205

<sup>3</sup> University of Wisconsin School of Medicine and Public Health, Department of Family Medicine, Madison, Wisconsin

\* [vchung@cuhk.edu.hk](mailto:vchung@cuhk.edu.hk)

### **Appendix I : Search strategies for each databases**

#### MEDLINE

1. exp osteoarthritis/
  2. osteoarthr\$.tw.
  3. (degenerative adj2 arthritis).tw.
  4. arthrosis.tw.
  5. Prolotherapy.tw.
  6. (Regenerative inject\$).tw.
  7. (Hypertonic dextrose inject\$).tw.
- clinical trial.mp.  
clinical trial.pt.  
random:.mp. OR tu.xs.

#### EMBASE

1. exp osteoarthritis/
  2. osteoarthr\$.tw.
  3. (degenerative adj2 arthritis).tw.
  4. arthrosis.tw.
  5. Prolotherapy.tw.
  6. (Regenerative inject\$).tw.
  7. (Hypertonic dextrose inject\$).tw.
- random:.tw.  
OR clinical trial:.mp.  
OR exp health care quality

CENTRAL

1. exp osteoarthritis/
2. osteoarthr\$.tw.
3. (degenerative adj2 arthritis).tw.
4. arthrosis.tw.
5. Prolotherapy.tw.
6. (Regenerative inject\$).tw.
7. (Hypertonic dextrose inject\$).tw.

Global Health, NHS Health Technology Assessment Database, Digital Dissertation Consortium, International Pharmaceutical Abstract, BIOSIS Preview. AMED, Inspec, Ovid Nursing Database

1. Prolotherapy.tw.
2. (Regenerative inject\$).tw.
3. (Hypertonic dextrose inject\$).tw.
